# Supplementary material
Source: PubMed Central journal article supplement (PMC5988203)
Supplement: NIHMS969821-supplement-Supplementary_Information.pdf [file NIHMS969821-supplement-Supplementary_Information.pdf]

## Supplementary Information

### **CD44v6 increases gastric cancer malignant phenotype by modulating adipose stromal cell-mediated ECM remodeling**

Bianca N. Lourenço<sup>1,2,3,4,5</sup>, Nora Springer<sup>1,6</sup>, Daniel Ferreira<sup>2,3,4,7</sup>, Carla Oliveira<sup>2,4,8</sup>, Pedro L. Granja<sup>2,3,5,7</sup>, Claudia Fischbach<sup>1,9,\*</sup>

<sup>1</sup>Nancy E. and Peter C. Meinig School of Biomedical Engineering, Cornell University, Ithaca, NY, United States

<sup>2</sup>i3S - Instituto de Investigação e Inovação em Saúde, Universidade do Porto, Portugal

<sup>3</sup>INEB - Instituto de Engenharia Biomédica, Universidade do Porto, Portugal

<sup>4</sup>IPATIMUP - Institute of Molecular Pathology and Immunology of the University of Porto, Portugal

<sup>5</sup>Faculdade de Engenharia, Universidade do Porto, Portugal

<sup>6</sup>Biological and Biomedical Sciences, Cornell University, Ithaca, NY, United States

<sup>7</sup>Instituto de Ciências Biomédicas Abel Salazar, Universidade do Porto, Portugal

<sup>8</sup>Departamento de Patologia e Oncologia, Faculdade de Medicina, Universidade do Porto, Portugal

<sup>9</sup>Kavli Institute at Cornell for Nanoscale Science, Cornell University, Ithaca, NY, United States

\*Corresponding author. E-mail: cf99@cornell.edu

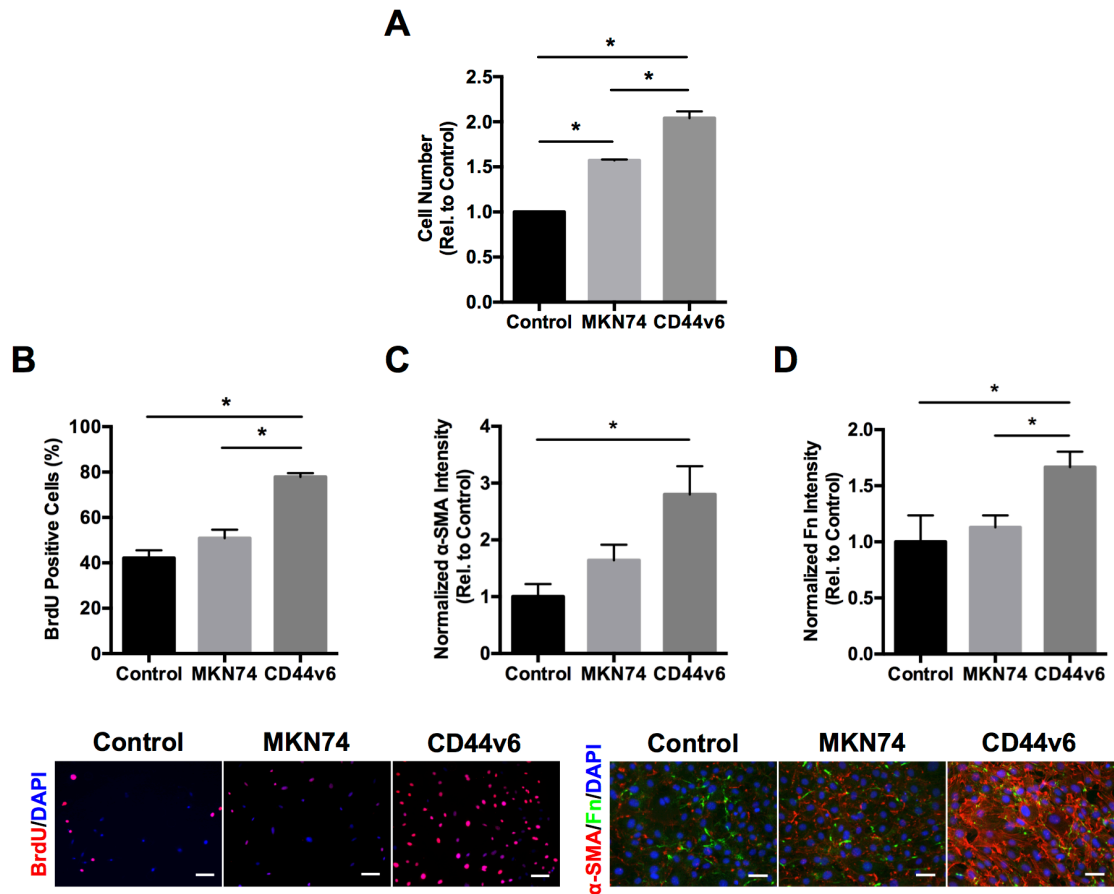

**Fig. S1. Tumor-secreted soluble factors from CD44v6 expressing cells increase 3T3-L1s function.** (A) Number of 3T3-L1s after culture in TCMs from Control, MKN28, and CD44v6 cells relative to Control (n = 3). (B) BrdU incorporation of 3T3-L1s as determined by immunofluorescence image analysis (n = 43 images per condition) \* p < 0.05. (C and D) Immunofluorescence image analysis of α-smooth muscle actin (α-SMA) and fibronectin (Fn) of 3T3-L1s relative to Control (n = 14 images per condition). Scale bars = 20 μm.

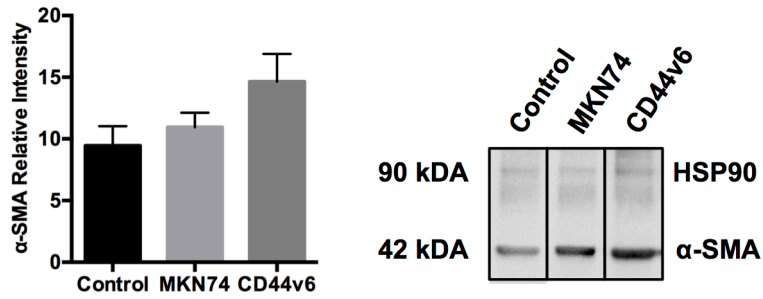

**Fig. S2. Tumor-secreted soluble factors from CD44v6 expressing cells enhance ASC differentiation into myofibroblasts.** Western blot quantification of  $\alpha$ -SMA expressed by TCM-treated ASCs relative to the corresponding HSP90 levels (n = 3).

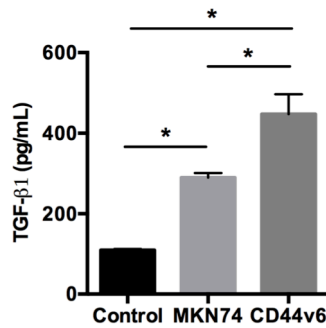

**Fig. S3. CD44v6 expression increases GC cell secretion of transforming growth factor- $\beta$  (TGF- $\beta$ ).** TGF- $\beta$  secretion of MKN28 and CD44v6 cells as measured by ELISA (n = 3) \* p < 0.05.

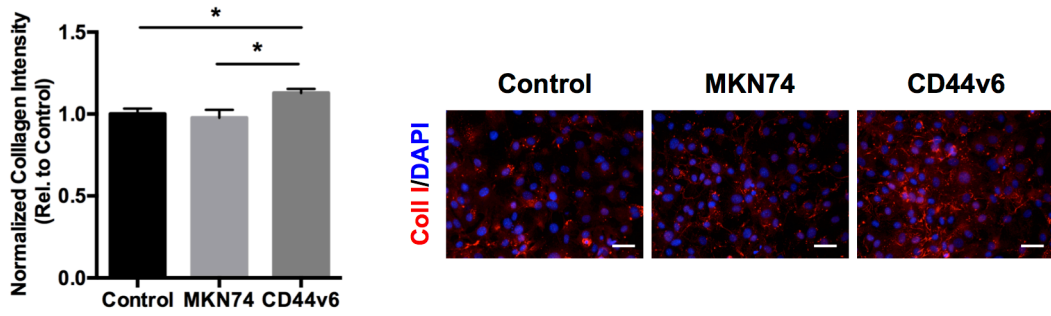

**Fig. S4. Culture in CD44v6 TCM increases type I collagen matrix assembly by ASCs.** Immunofluorescence image analysis of type I collagen deposited by TCM-treated ASCs relative to Control (n = 19 images per condition) \* p < 0.05. Scale bars = 20  $\mu$ m
